# Supplementary material
Source: publisher figshare collection journal article supplement (https://rs.figshare.com/ndownloader/files/14341328)
Supplement: Supplementary file 1 [file 14341328]

# **The unified rule of phyllotaxis explaining both spiral and non-spiral arrangements**

## **Supplemental Materials**

Takuya Okabe<sup>1</sup>, Atsushi Ishida<sup>2</sup> and Jin Yoshimura<sup>3,4,5</sup>

<sup>1</sup>Graduate School of Integrated Science and Technology, Shizuoka University, 3-5-1 Johoku, Hamamatsu 432-8561, Japan

<sup>2</sup>Center for Ecological Research, Kyoto University, Otsu, Shiga 520-2113, Japan.

<sup>3</sup>Graduate School of Science and Technology, and Department of Mathematical Systems Engineering, Shizuoka University, Hamamatsu 432-8561, Japan

<sup>4</sup> Department of Environmental and Forest Biology, State University of New York College of Environmental Science and Forestry, Syracuse, NY13210 USA.

<sup>5</sup> Marine Biosystems Research Center, Chiba University, Uchiura, Kamogawa, Chiba 299-5502, Japan.

**Corresponding author:** Takuya Okabe (okabe.takuya@shizuoka.ac.jp)

### **Supplementary Text**

According to observations, the main sequence patterns of an elongated shoot ( $1/3$ ,  $2/5$ ,  $3/8$ , etc.) originate from the  $137.5^\circ$  arrangement at the shoot tip, depending on the vascular connections (fig. S1). The present model considers what longitudinal arrangements originate from a general angle.

Three patterns for  $360\alpha=78.0$ ,  $99.5$ , and  $137.5$  degrees are shown in fig. S2a-c, where each arrow indicates the tendency to the nearest vertical arrangement. The first two angles

are of anomalous spiral phyllotaxis, which are rarely found in place of the third angle of normal spiral phyllotaxis. When  $\alpha$  is close to these angles, fitness  $f$  is given by

$$f_a = -w_2(\alpha - 1/2)^2 - w_3(\alpha - 1/3)^2 - w_4(\alpha - 1/4) - w_5(\alpha - 1/5)^2,$$

$$f_b = -w_2(\alpha - 1/2)^2 - w_3(\alpha - 1/3)^2 - w_4(\alpha - 1/4) - w_5(\alpha - 1/4)^2,$$

and

$$f_c = -w_2(\alpha - 1/2)^2 - w_3(\alpha - 1/3)^2 - w_4(\alpha - 2/5)^2 - w_5(\alpha - 2/5)^2,$$

respectively. Frequencies  $w_i$  ( $i=2\sim5$ ) are non-negative parameters satisfying  $w_2 + w_3 + w_4 + w_5 = 1$ . Since higher-order patterns are neglected for simplicity, no other case than the above three cases need be considered.

For  $w_2 = w_3 = w_4 = w_5 = 1/4$ , the three functions are plotted in fig. S2d. Fitness  $f$  for general values of  $\alpha$  and  $w_m$  is given by the maximum (most fitted) among the three cases,

$$f = \max[f_a, f_b, f_c].$$

To put it explicitly,  $f = f_a$  for  $0 < \alpha < 0.225$ ,  $f = f_b$  for  $0.225 < \alpha < 0.325$ , and  $f = f_c$  for  $0.325 < \alpha < 1/2$ . Two peaks in Fig. 2d-f are due to  $f_b$  and  $f_c$ . In general,  $f_c$  is larger than  $f_a$  and  $f_b$ , while  $f_b$  can be as large as  $f_c$  if  $w_2 = w_3 = 0$ ,  $w_4 + w_5 = 1$ .

The peak of  $f_c$  lies at

$$\alpha = w_2/2 + w_3/3 + 2(w_4 + w_5)/5,$$

Where  $\partial f_c / \partial \alpha = 0$ . Thus, this optimal angle  $\alpha$  is an weighted average of Schimper-Braun fractions  $1/2$ ,  $1/3$  and  $2/5$ , which occur with relative frequencies  $w_2$ ,  $w_3$ , and  $w_4 + w_5$ ,

respectively.

In principle, it is possible to evaluate the parameters  $w_i$  from the frequencies of occurrence of various patterns. In practice, however, no data has been published except in the original work of Bonnet [1]. Figure S3 shows irregular variations of the cycle 5 of a 2/5 phyllotaxis observed on branches of various plants. According to the top of the fourth column, three 3-cycles and six 5-cycles were observed on a peach tree, indicating that 1/3 and 2/5 occur with a relative frequency of three times 3 to six times 5, or  $w_3:w_4+w_5=9:30$ . Therefore,  $w_3=3/130.23$  and  $w_4=w_5=5/130.39$ . These are used as representative values in Fig. 2f and Fig. 3d of the main text. The present model is so skeletal that high accuracy is not claimed for the  $137.5^\circ$  angle value. If the model is properly generalized to take account of higher-order patterns (like 3/8 and 5/13), optimal angle approaches to the ideal value  $137.5^\circ$  [2].

To visualize evolutionary trajectories, a further parameter has to be introduced. In terms of the ratio  $c$  of evolutionary rates of  $\alpha$  and  $w_2$ ,  $(\alpha, w_2)$  evolves in the direction of  $(\partial f/\partial \alpha, c \partial f/\partial w_2)$ . In Fig. 3b,  $c=10$ .

1. Bonnet, C. 1754 *Recherches sur l'usage des feuilles dans les plantes*. Elie Luzac, fils.
2. Okabe, T. 2015 Biophysical optimality of the golden angle in phyllotaxis. *Scientific Reports* **5**, 15358.

### Supplementary Figures S1-3

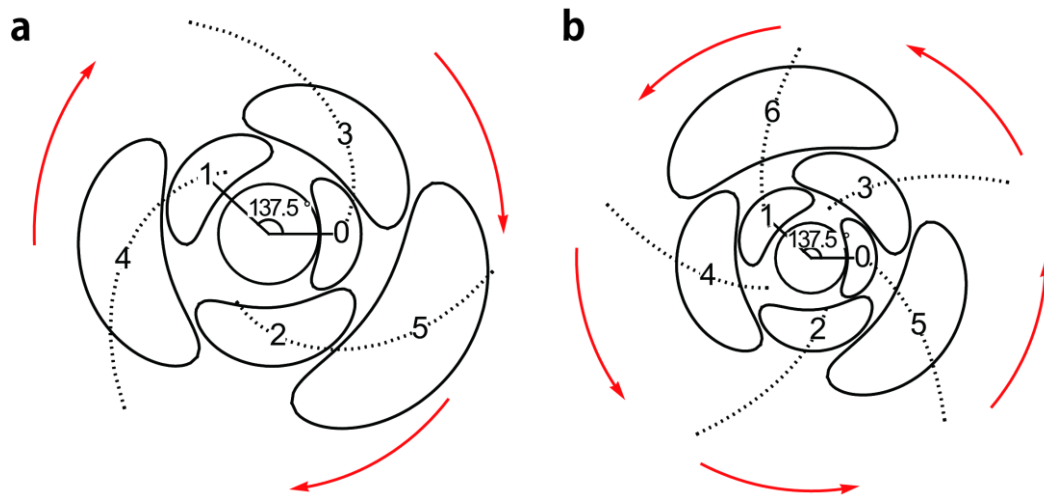

Figure S1: The  $137.5^\circ$  arrangement at the shoot tip gives rise to (a) 1/3 and (b) 2/5 phyllotaxis as the vascular bundles (dotted curves) are strengthened whereby the stem is twisted (arrows).

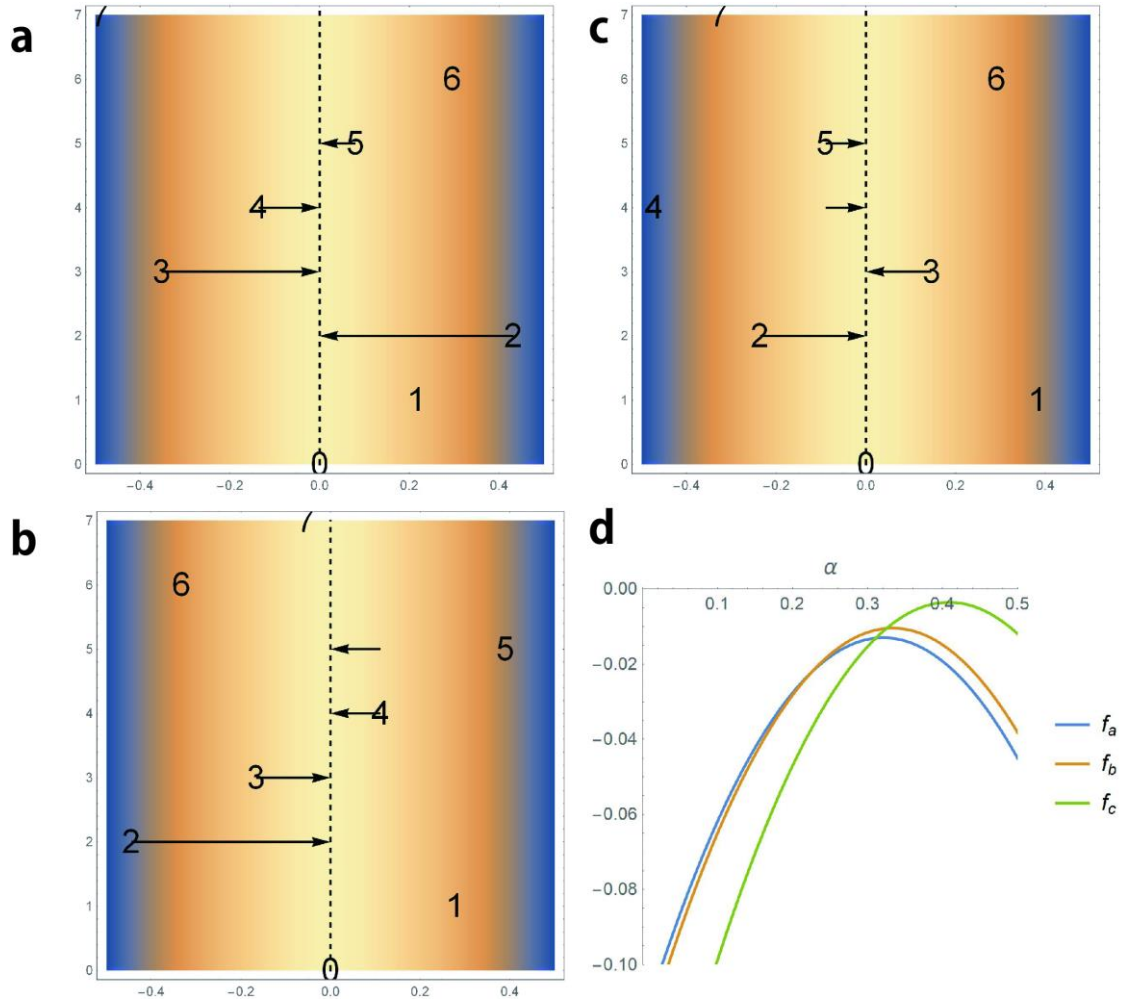

Figure S2: An arrow indicates tendency of leaves to a longitudinal arrangement (a)  $360\alpha=78.0$  ( $\alpha=0.216$ ). (b)  $360\alpha=99.5$  ( $\alpha=0.276$ ). (c)  $360\alpha=137.5$  ( $\alpha=0.382$ ). (d)  $f_a, f_b$  and  $f_c$  as a function of  $\alpha$  for  $w_2=w_3=w_4=w_5=1/4$ .

| Poirier.                              | Prunier.                 | Abricotier.                          | Pescher.                             | Peuplier.                             | Cerisier.                | Figuier.                 | Grofeiller.              |
|---------------------------------------|--------------------------|--------------------------------------|--------------------------------------|---------------------------------------|--------------------------|--------------------------|--------------------------|
| Branche<br>de<br>3 piés $\frac{1}{2}$ | Branche<br>de<br>3 piés. | Branche<br>de<br>4 piés.             | Branche<br>de<br>3 piés.             | Branche<br>de<br>1 pié $\frac{1}{2}$  | Branche<br>de<br>2 piés. | Branche<br>de<br>2 piés. | Branche<br>de<br>2 piés. |
| 5.                                    | 5.                       | 5.                                   | 5.                                   | 5.                                    | 5.                       | 5.                       | 5.                       |
| 5.                                    | 5.                       | 5.                                   | 5.                                   | 5.                                    | 5.                       | 5.                       | 5.                       |
| 5.                                    | 5.                       | 8.                                   | 5.                                   | 5.                                    | 5.                       |                          | 5.                       |
| 5.                                    | 5.                       | 5.                                   | 5.                                   | 5.                                    |                          |                          |                          |
| 5.                                    | 5.                       | 5.                                   | 5.                                   | 5.                                    |                          |                          |                          |
|                                       | 5.                       | 8.                                   | 3.                                   |                                       |                          |                          |                          |
|                                       | 5.                       | 8.                                   | 3.                                   |                                       |                          |                          |                          |
|                                       | 5.                       | 8.                                   | 3.                                   |                                       |                          |                          |                          |
|                                       | 5.                       | 8.                                   |                                      |                                       |                          |                          |                          |
|                                       |                          |                                      |                                      |                                       |                          |                          |                          |
|                                       |                          | Pommier.                             | Meurier.                             | Tremble.                              | Framboisier              |                          |                          |
|                                       |                          | Branche<br>de<br>1 pié.<br>9 pouces. | Branche<br>de<br>3 piés<br>4 pouces. | Branche<br>de<br>3 piés<br>10 pouces. | Branche<br>de<br>3 piés. |                          |                          |
|                                       |                          | 5.                                   | 2.                                   | 5.                                    | 5.                       |                          |                          |
|                                       |                          | 3.                                   | 7.                                   | 5.                                    |                          |                          |                          |
|                                       |                          | 5.                                   | 5.                                   | 5.                                    |                          |                          |                          |
|                                       |                          | 5.                                   | 5.                                   |                                       |                          |                          |                          |

Figure S3: Irregular variations of the cycle 5 of a  $2/5$  phyllotaxis on individual branches of various plants [1] (not in copyright).
